# Supplementary material
Source: Frontiers journal article supplement (https://www.frontiersin.org/articles/495100)
Supplement: Table_2.XLSX [file Table_2.XLSX]

## Sheet: SigCpGs_annots
treatment	chr	start	end	pvalue	qvalue	meth.diff	glean_id	spu_id	common_name	synonyms	best_genebank_hit	ortholog_homolog
M	Scaffold408	636868	636868	2.45442e-90	4.64851e-86	63.507	GLEAN3_04722	SPU_004722	Sp-Wdr26	WDR26	XM_779272	5
M	Scaffold2737	30221	30221	8.74921e-88	1.35576e-83	-66.2258	GLEAN3_19940	SPU_019940	Sp-Osbpl10	oxysterol binding protein-like 10	NP_060254.2	1|NP_060254.2
M	Scaffold77	855950	855950	2.29325e-87	3.25744e-83	74.2768	GLEAN3_02029	SPU_002029	Sp-Unk_14	none	none	5
M	Scaffold331	29536	29536	6.24831e-75	6.265e-71	-37.1898	GLEAN3_19508	SPU_019508	Sp-Z371	zinc finger protein 371	XP_003736127	4
M	Scaffold25	104716	104716	1.54766e-65	1.05522e-61	46.4517	GLEAN3_26495	SPU_026495	Sp-Traf3	LAP1; CAP-1; CRAF1	none	1|TRAF3
M	Scaffold77	855855	855855	2.40726e-56	1.05212e-52	-65.6209	GLEAN3_02029	SPU_002029	Sp-Unk_14	none	none	5
M	Scaffold408	607431	607431	3.9607e-51	1.2983e-47	-26.5115	GLEAN3_04722	SPU_004722	Sp-Wdr26	WDR26	XM_779272	5
M	Scaffold2386	86908	86908	3.19647e-48	9.08084e-45	-70.4264	GLEAN3_01633	SPU_001633	Sp-Unk_109	none	none	5
M	Scaffold2594	54534	54534	1.13907e-47	3.13159e-44	-25.4983	GLEAN3_11821	SPU_011821	Sp-Fbxw7L_1	F-box and WD-40 domain protein 7-like-1	EEC13723.1	1|EEC13723.1
M	Scaffold606	146253	146253	8.20995e-47	2.12033e-43	41.0631	none	SPU_009054	none	none	none	none
M	Scaffold526	271800	271800	5.17881e-46	1.26635e-42	36.7214	GLEAN3_13608	SPU_013608	Sp-Dj1p	Park7	NP_009193	5
M	Scaffold526	271864	271864	3.13954e-45	7.23171e-42	-26.1504	GLEAN3_13608	SPU_013608	Sp-Dj1p	Park7	NP_009193	5
M	Scaffold1060	420242	420242	6.74193e-44	1.45467e-40	28.6533	GLEAN3_12329	SPU_012329	Sp-Stx1	syntaxin 1, exocytosis regulatory protein	NP_999785	1|Stx1a
M	Scaffold606	146275	146275	1.27548e-42	2.65134e-39	41.8139	none	SPU_009054	none	none	none	none
M	Scaffold257	237273	237273	4.13899e-36	6.4137e-33	29.9264	GLEAN3_02985	SPU_002985	Sp-Krp85_1	kinesin-II 85 kDa subunit, kinesin family member 3A-like, Sp-Kif3a	XP_003498529	1|Kif3a - kinesin family member 3A [Mus musculus]
M	Scaffold91	534415	534415	1.71325e-32	2.06379e-29	-50.9487	GLEAN3_19513	SPU_019513	Sp-Tsen34L_1	tRNA splicing endonuclease 34 homolog (S. cerevisiae)-like-1; tRNA-intron endonuclease 34-like	NP_077130.1	1|NP_077130.1
M	Scaffold91	534415	534415	1.71325e-32	2.06379e-29	-50.9487	GLEAN3_12577	SPU_012577	Sp-Tsen34L	tRNA splicing endonuclease 34 homolog (S. cerevisiae)-like	EDL84927.1	1|EDL84927.1
M	Scaffold1082	182518	182518	4.07696e-32	4.6329e-29	44.8505	GLEAN3_26898	SPU_026898	Sp-Glutamyl/tRNAsynth	Glutaminyl-tRNA Synthetase	AAI10785	5
M	Scaffold305	408255	408255	4.49792e-30	4.40625e-27	-31.4902	GLEAN3_25975	SPU_025975	Sp-Dcc/NeogL	none	AAH54540.1	none
M	Scaffold606	146267	146267	4.66979e-30	4.54721e-27	34.1557	none	SPU_009054	none	none	none	none
M	Scaffold40	528979	528979	1.35471e-29	1.26183e-26	-33.2449	GLEAN3_15085	SPU_015085	Sp-Fam116a	family with sequence similarity 116, member A	AAH54343.1	1|AAH54343.1
M	Scaffold1596	73021	73021	1.07012e-27	8.98556e-25	32.7644	GLEAN3_21404	SPU_021404	Sp-Mfcad	aspartate transcarbamylase, dihydroorotase, carbamoyl-phosphate synthetase 2	BAA11423	2|Peptidase_M38
M	Scaffold1072	94666	94666	2.94078e-27	2.42158e-24	56.0123	GLEAN3_20767	SPU_020767	Sp-Kif13BL	kinesin family member 13B [Homo sapiens]	NP_056069	1|kinesin family member 13B [Homo sapiens]
M	Scaffold1072	94666	94666	2.94078e-27	2.42158e-24	56.0123	GLEAN3_06602	SPU_006602	Sp-Kif13A2	Kinesin 13A2, KIF1	CAC20443	1|KIF13A2
M	Scaffold252	480608	480608	3.55563e-27	2.88605e-24	-35.0706	GLEAN3_21200	SPU_021200	Sp-Whirlin	CIP98; CASK interacting protein, KIAA1526	56404975	1|Whirlin
M	Scaffold84	386664	386664	5.12812e-27	4.10379e-24	39.2067	GLEAN3_08961	SPU_008961	Sp-Hypp_1817	hypothetical protein-1817	EDO40381.1	1|EDO40381.1
M	Scaffold84	386664	386664	5.12812e-27	4.10379e-24	39.2067	GLEAN3_12788	SPU_012788	Sp-Qrich2L	glutamine rich 2-like	XP_001081721.1	1|XP_001081721.1
M	Scaffold356	368483	368483	3.34831e-26	2.5825e-23	-30.0077	none	SPU_024710	none	none	none	none
M	Scaffold463	368989	368989	6.71203e-26	5.08485e-23	-36.1463	GLEAN3_28462	SPU_028462	Sp-Flj13072L	similar to RIKEN cDNA 2410004F06	XP_117117	1|XP_117117
M	Scaffold463	368985	368985	1.57694e-25	1.14381e-22	-33.647	GLEAN3_28462	SPU_028462	Sp-Flj13072L	similar to RIKEN cDNA 2410004F06	XP_117117	1|XP_117117
M	Scaffold356	368445	368445	2.49567e-25	1.7799e-22	-29.6296	none	SPU_024710	none	none	none	none
M	Scaffold229	327241	327241	4.45961e-25	3.09008e-22	-52.0973	GLEAN3_24241	SPU_024241	Sp-Cdc37	CDC37 homolog	NP_008996	1|CDC37
M	Scaffold562	72566	72566	5.27888e-25	3.64294e-22	26.8809	GLEAN3_09271	SPU_009271	Sp-Nat10	N-acetyltransferase 10	XP_540549.2	1|XP_540549.2
M	Scaffold2350	57488	57488	3.60288e-24	2.31745e-21	-32.6988	GLEAN3_23358	SPU_023358	Sp-Heldr5_2	replicase/helicase/endonuclease-like; helentron 5 helitron-like transposon replicase/helicase/endonuclease	DAA01288.1	1|DAA01288.1
M	Scaffold356	368500	368500	3.83786e-24	2.45932e-21	-27.168	none	SPU_024710	none	none	none	none
M	Scaffold53	673709	673709	5.14204e-24	3.27045e-21	-28.8477	GLEAN3_03391	SPU_003391	Sp-Ube3cL	ubiquitin protein ligase E3C-like	AAI20732.1	2|AAI20732.1
M	Scaffold40	529046	529046	2.10149e-23	1.29785e-20	25.3612	GLEAN3_15085	SPU_015085	Sp-Fam116a	family with sequence similarity 116, member A	AAH54343.1	1|AAH54343.1
M	Scaffold463	368969	368969	4.92004e-23	2.9426e-20	-32.2249	GLEAN3_28462	SPU_028462	Sp-Flj13072L	similar to RIKEN cDNA 2410004F06	XP_117117	1|XP_117117
M	Scaffold2350	57525	57525	3.41098e-22	1.94453e-19	-33.6489	GLEAN3_23358	SPU_023358	Sp-Heldr5_2	replicase/helicase/endonuclease-like; helentron 5 helitron-like transposon replicase/helicase/endonuclease	DAA01288.1	1|DAA01288.1
M	Scaffold504	796420	796420	8.31397e-22	4.57145e-19	-33.184	GLEAN3_16285	SPU_016285	Sp-Hypp_126	hypp-126; MICAL-like	none	1|hypp-126; MICAL-like
D	Scaffold3635	10925	10925	8.61938e-24	7.59762e-19	26.822	GLEAN3_05584	SPU_005584	Sp-Gtf3c5	general transcription factor IIIC, polypeptide 5	AAH30157.2	1|AAH30157.2
M	Scaffold1132	50873	50873	1.51905e-21	8.16808e-19	-25.1634	GLEAN3_22682	SPU_022682	Sp-Rps11	ribosomal protein S11	NP_001006	1|human RPS11
M	Scaffold71	566124	566124	1.77927e-21	9.47761e-19	-30.131	GLEAN3_01427	SPU_001427	Sp-Syne1L	spectrin repeat containing, nuclear envelope 1-like	EAW47737.1	1|EAW47737.1
M	Scaffold71	566124	566124	1.77927e-21	9.47761e-19	-30.131	GLEAN3_13237	SPU_013237	Sp-Syne1	spectrin repeat containing, nuclear envelope 1	CAQ57272.1	1|spectrin repeat containing, nuclear envelope 1
M	Scaffold165	40918	40918	2.16096e-21	1.14039e-18	26.6088	GLEAN3_16903	SPU_016903	Sp-Cxxc1	CXXC finger 1 (PHD domain)	EDL09538.1	1|CXXC finger 1 (PHD domain)
M	Scaffold356	368473	368473	2.52702e-21	1.32536e-18	-26.4496	none	SPU_024710	none	none	none	none
M	Scaffold11	589057	589057	2.53783e-21	1.32694e-18	-29.6013	none	SPU_018703	none	none	none	none
D	Scaffold10	1326317	1326317	2.50162e-23	1.47005e-18	34.3113	GLEAN3_20068	SPU_020068	Sp-Hypp_960	hypothetical protein-960; brain-enriched guanylate kinase-associated-like	XP_002230359.1	1|XP_002230359.1
M	Scaffold1355	112307	112307	6.89931e-21	3.45887e-18	28.4644	GLEAN3_12780	SPU_012780	Sp-Slc6a5_5	solute carrier family 6 (neurotransmitter transporter, glycine), member 5-5	EEN48898.1	2|EEN48898.1
M	Scaffold1355	112307	112307	6.89931e-21	3.45887e-18	28.4644	GLEAN3_08617	SPU_008617	Sp-Glyt_5	glycine transporter	BAD67440.1	1|glycine transporter
M	Scaffold1043	64317	64317	2.85172e-20	1.34278e-17	-26.7677	GLEAN3_26126	SPU_026126	Sp-Hypp_241	hypothetical protein-241; pol polyprotein-like	XP_002121098.1	1|XP_002121098.1
M	Scaffold463	368995	368995	3.20446e-20	1.50059e-17	-31.5367	GLEAN3_28462	SPU_028462	Sp-Flj13072L	similar to RIKEN cDNA 2410004F06	XP_117117	1|XP_117117
M	Scaffold1889	136734	136734	3.51097e-20	1.60445e-17	-32.6576	GLEAN3_15413	SPU_015413	Sp-Fbs_2	fibrosurfin-2	CAC20782.1	3|CAC20782.1
M	Scaffold1889	136734	136734	3.51097e-20	1.60445e-17	-32.6576	GLEAN3_27690	SPU_027690	Sp-PppL_234	pol polyprotein like-234	XP_001920103.1	3|XP_001920103.1
M	Scaffold37	127166	127166	5.45149e-20	2.43892e-17	42.5676	GLEAN3_17648	SPU_017648	Sp-Hypp137	hypothetical protein-137, DNA polymerase type B-like, Sp-Hypp_137, Sp-Hypp_950, Sp-Hypp_1329	XP_003731350	5
M	Scaffold37	127166	127166	5.45149e-20	2.43892e-17	42.5676	GLEAN3_19851	SPU_019851	Sp-Hypp_950	hypothetical protein-950; DNA polymerase-like	NA	3|XP_001599889.1
M	Scaffold37	127166	127166	5.45149e-20	2.43892e-17	42.5676	GLEAN3_01448	SPU_001448	Sp-Hypp_1329	hypothetical protein-1329	NA	1|XP_001600116.1
M	Scaffold1040	110359	110359	7.53054e-20	3.33405e-17	-26.8487	GLEAN3_06977	SPU_006977	Sp-Hypp_3072	hypothetical protein-3072	none	5
M	Scaffold1176	5068	5068	8.11613e-20	3.584e-17	-32.0513	GLEAN3_04948	SPU_004948	Sp-Greb1L	GREB1 protein-like; gene regulated by estrogen in breast cancer protein-like	EAX00927.1	1|EAX00927.1
M	Scaffold463	369022	369022	2.18354e-19	9.28163e-17	-33.013	GLEAN3_28462	SPU_028462	Sp-Flj13072L	similar to RIKEN cDNA 2410004F06	XP_117117	1|XP_117117
M	Scaffold11	687112	687112	2.32649e-19	9.86468e-17	-25.8385	GLEAN3_13529	SPU_013529	Sp-Slc4a2_1	Anion exchange protein 2 (Non-erythroid band 3-like protein) (AE2 anion exchanger) (Solute carrier family 4 member 2)	20178275	none
M	Scaffold1355	112305	112305	6.87954e-19	2.79201e-16	25.8427	GLEAN3_12780	SPU_012780	Sp-Slc6a5_5	solute carrier family 6 (neurotransmitter transporter, glycine), member 5-5	EEN48898.1	2|EEN48898.1
M	Scaffold1355	112305	112305	6.87954e-19	2.79201e-16	25.8427	GLEAN3_08617	SPU_008617	Sp-Glyt_5	glycine transporter	BAD67440.1	1|glycine transporter
M	Scaffold1355	112314	112314	6.87954e-19	2.79201e-16	25.8427	GLEAN3_12780	SPU_012780	Sp-Slc6a5_5	solute carrier family 6 (neurotransmitter transporter, glycine), member 5-5	EEN48898.1	2|EEN48898.1
M	Scaffold1355	112314	112314	6.87954e-19	2.79201e-16	25.8427	GLEAN3_08617	SPU_008617	Sp-Glyt_5	glycine transporter	BAD67440.1	1|glycine transporter
M	Scaffold858	650554	650554	3.42786e-18	1.26744e-15	25.8452	none	SPU_012066	none	none	none	none
M	Scaffold939	44230	44230	3.63994e-18	1.34005e-15	32.8983	GLEAN3_27122	SPU_027122	Sp-Hypp_1198	hypothetical protein-1198	none	5
M	Scaffold356	368433	368433	6.56935e-18	2.33773e-15	-25.0258	none	SPU_024710	none	none	none	none
M	Scaffold478	613871	613871	1.38561e-17	4.72365e-15	-27.1874	GLEAN3_16194	SPU_016194	Sp-Unk_24	none	AAI00559	5
M	Scaffold863	220237	220237	1.97173e-17	6.55144e-15	-35.7871	none	SPU_001856	none	none	none	none
M	Scaffold863	220237	220237	1.97173e-17	6.55144e-15	-35.7871	GLEAN3_01859	SPU_001859	Sp-Pura	Purine-rich binding protein	NM_166769	5
M	Scaffold982	153098	153098	2.76373e-17	8.97311e-15	29.5185	GLEAN3_22770	SPU_022770	Sp-Slu7	Step II Splicing factor SLU7	NP_006416	1|human SLU7
M	Scaffold349	61021	61021	5.17961e-17	1.59366e-14	26.9842	GLEAN3_00018	SPU_000018	Sp-CspL	circumsporozoite protein like	AAA29526.1	1|circumsporozoite protein like
M	Scaffold939	99224	99224	5.27228e-17	1.61925e-14	25.0751	GLEAN3_27713	SPU_027713	Sp-Pcbp2	Poly(C) binding protein	P61978	1|alpha-CP1
M	Scaffold37	127145	127145	6.12219e-17	1.87016e-14	39.6146	GLEAN3_01448	SPU_001448	Sp-Hypp_1329	hypothetical protein-1329	NA	1|XP_001600116.1
M	Scaffold37	127145	127145	6.12219e-17	1.87016e-14	39.6146	GLEAN3_17648	SPU_017648	Sp-Hypp137	hypothetical protein-137, DNA polymerase type B-like, Sp-Hypp_137, Sp-Hypp_950, Sp-Hypp_1329	XP_003731350	5
M	Scaffold37	127145	127145	6.12219e-17	1.87016e-14	39.6146	GLEAN3_19851	SPU_019851	Sp-Hypp_950	hypothetical protein-950; DNA polymerase-like	NA	3|XP_001599889.1
M	Scaffold1889	136704	136704	1.31318e-16	3.82627e-14	-29.4985	GLEAN3_27690	SPU_027690	Sp-PppL_234	pol polyprotein like-234	XP_001920103.1	3|XP_001920103.1
M	Scaffold1889	136704	136704	1.31318e-16	3.82627e-14	-29.4985	GLEAN3_15413	SPU_015413	Sp-Fbs_2	fibrosurfin-2	CAC20782.1	3|CAC20782.1
M	Scaffold2350	57650	57650	1.33837e-16	3.88639e-14	-35.5183	GLEAN3_23358	SPU_023358	Sp-Heldr5_2	replicase/helicase/endonuclease-like; helentron 5 helitron-like transposon replicase/helicase/endonuclease	DAA01288.1	1|DAA01288.1
M	Scaffold982	153100	153100	1.43506e-16	4.14596e-14	28.7121	GLEAN3_22770	SPU_022770	Sp-Slu7	Step II Splicing factor SLU7	NP_006416	1|human SLU7
M	Scaffold65	160895	160895	1.57532e-16	4.48634e-14	-46.8478	GLEAN3_12766	SPU_012766	Sp-Ip3r_3	inositol 1,4,5-triphosphate receptor, IP3R	BAB84088	5
M	Scaffold535	516154	516154	2.46149e-16	6.83341e-14	25.1686	GLEAN3_22357	SPU_022357	Sp-Xpo7	Exportin-7, Ran-binding protein 16	AJ297360	5
M	Scaffold1889	136765	136765	3.48134e-16	9.35975e-14	-29.0104	GLEAN3_15413	SPU_015413	Sp-Fbs_2	fibrosurfin-2	CAC20782.1	3|CAC20782.1
M	Scaffold1889	136765	136765	3.48134e-16	9.35975e-14	-29.0104	GLEAN3_27690	SPU_027690	Sp-PppL_234	pol polyprotein like-234	XP_001920103.1	3|XP_001920103.1
D	Scaffold3635	10936	10936	2.21701e-17	1.42517e-13	27.1959	GLEAN3_05584	SPU_005584	Sp-Gtf3c5	general transcription factor IIIC, polypeptide 5	AAH30157.2	1|AAH30157.2
M	Scaffold2350	57473	57473	1.35539e-15	3.29105e-13	-29.477	GLEAN3_23358	SPU_023358	Sp-Heldr5_2	replicase/helicase/endonuclease-like; helentron 5 helitron-like transposon replicase/helicase/endonuclease	DAA01288.1	1|DAA01288.1
M	Scaffold3684	21522	21522	1.72982e-15	4.11808e-13	-32.95	none	SPU_028059	none	none	none	none
M	Scaffold368	410744	410744	1.9601e-15	4.62047e-13	-27.1684	none	SPU_014816	none	none	none	none
D	Scaffold132	826931	826931	9.09564e-17	5.30861e-13	37.1683	GLEAN3_02686	SPU_002686	Sp-Gucy1b2	Guanylate cyclase soluble, beta-2 chain (GCS-beta-2)	14916977	none
M	Scaffold737	329545	329545	3.82769e-15	8.63021e-13	-27.8288	GLEAN3_05833	SPU_005833	Sp-Slco3a1_1	Solute carrier organic anion transporter family member 3A1 (Solute carrier family 21 member 11) (Sodium-independent organic anion transporter D) (Organic anion transporting polypeptide D) (OATP-D) (Organic anion transporter polypeptide related protein 3) (OATP-RP3) (OATPRP3) (PGE1 transporter)	27734566	none
M	Scaffold3582	42785	42785	3.99471e-15	8.94762e-13	26.4673	GLEAN3_28301	SPU_028301	Sp-Z163	zinc finger protein 163	CDQ59788.1	4
D	Scaffold1238	171763	171763	1.83942e-16	9.82651e-13	29.839	GLEAN3_07763	SPU_007763	Sp-Mucpdn	TRPML	NM018298.9	5
M	Scaffold614	146151	146151	8.95098e-15	1.89062e-12	28.4884	GLEAN3_00048	SPU_000048	Sp-Slc31a1	solute carrier family 31 (copper transporters), member 1	55859552	none
M	Scaffold100	128453	128453	1.23805e-14	2.55485e-12	31.7603	GLEAN3_25941	SPU_025941	Sp-Secisbp2L	SECIS binding protein 2-like	NP_076982.3	1|NP_076982.3
D	Scaffold1111	48690	48690	6.69927e-16	3.02827e-12	46.1061	GLEAN3_20909	SPU_020909	Sp-Plxnb1_2	plexin B1-2; semaphorin receptor SEP	BAA23703.2	3|BAA23703.2
M	Scaffold368	410774	410774	1.49266e-14	3.05806e-12	-25.6439	none	SPU_014816	none	none	none	none
M	Scaffold1015	17605	17605	2.52343e-14	4.97259e-12	25.8107	GLEAN3_23289	SPU_023289	Sp-Hypp_3000	Hypothetical protein_3000	XP_780287	5
M	Scaffold86	1056549	1056549	2.57529e-14	5.05724e-12	-35.4902	GLEAN3_12936	SPU_012936	Sp-ThrombB1	none	none	2|TSP3_HUMAN
M	Scaffold1286	79569	79569	2.58227e-14	5.0651e-12	27.9365	none	SPU_026378	none	none	none	none
M	Scaffold368	410784	410784	3.17116e-14	6.12853e-12	-25.2811	none	SPU_014816	none	none	none	none
M	Scaffold368	410735	410735	3.62034e-14	6.92594e-12	-25.4323	none	SPU_014816	none	none	none	none
D	Scaffold519	35411	35411	1.81991e-15	6.97469e-12	36.7081	GLEAN3_21026	SPU_021026	Sp-Hypp_1009	hypothetical protein-1009; lambda-recombinase-like protein-like	XP_001341023.1	1|XP_001341023.1
M	Scaffold324	168402	168402	5.91259e-14	1.09072e-11	25.2711	GLEAN3_25532	SPU_025532	Sp-Hypp_1151	hypothetical protein-1151; fem-1 homolog c (C. elegans)-like	XP_428816.2	1|XP_428816.2
D	Scaffold10	1326285	1326285	4.74056e-15	1.51949e-11	28.5923	GLEAN3_20068	SPU_020068	Sp-Hypp_960	hypothetical protein-960; brain-enriched guanylate kinase-associated-like	XP_002230359.1	1|XP_002230359.1
M	Scaffold2125	17517	17517	9.35442e-14	1.67665e-11	26.8988	GLEAN3_18218	SPU_018218	Sp-Myef2	myelin basic protein expression factor 2, repressor	BAC33325.1	1|myelin basic protein expression factor 2, repressor
M	Scaffold1889	136756	136756	1.14078e-13	2.02553e-11	-26.9104	GLEAN3_15413	SPU_015413	Sp-Fbs_2	fibrosurfin-2	CAC20782.1	3|CAC20782.1
M	Scaffold1889	136756	136756	1.14078e-13	2.02553e-11	-26.9104	GLEAN3_27690	SPU_027690	Sp-PppL_234	pol polyprotein like-234	XP_001920103.1	3|XP_001920103.1
M	Scaffold408	638844	638844	2.53678e-13	4.25595e-11	-27.1726	GLEAN3_04722	SPU_004722	Sp-Wdr26	WDR26	XM_779272	5
M	Scaffold2386	86822	86822	2.59629e-13	4.34723e-11	-26.4313	GLEAN3_01633	SPU_001633	Sp-Unk_109	none	none	5
M	Scaffold982	153096	153096	3.29905e-13	5.38635e-11	26.5314	GLEAN3_22770	SPU_022770	Sp-Slu7	Step II Splicing factor SLU7	NP_006416	1|human SLU7
M	Scaffold206	583886	583886	5.65655e-13	8.81336e-11	25.9259	GLEAN3_07036	SPU_007036	Sp-Vps35	vacuolar protein sorting 35 (S. cerevisiae) homolog, Mem3, Sp-Vps35h	XP_002740147	1|Vps35 - vacuolar protein sorting 35 [Mus musculus]
M	Scaffold1176	5045	5045	6.98561e-13	1.0641e-10	-25.6652	GLEAN3_04948	SPU_004948	Sp-Greb1L	GREB1 protein-like; gene regulated by estrogen in breast cancer protein-like	EAX00927.1	1|EAX00927.1
D	Scaffold144	524461	524461	6.26831e-14	1.36426e-10	32.1097	GLEAN3_00816	SPU_000816	Sp-Nlr81	NACHT and LRR containing protein	none	5
M	Scaffold60	58519	58519	9.38706e-13	1.39378e-10	28.0358	GLEAN3_02246	SPU_002246	Sp-Mekk4a	mitogen activated protein kinase kinase kinase 4a, MAP3K4a	NP_002392	5
M	Scaffold24	672033	672033	1.11776e-12	1.63401e-10	29.1877	GLEAN3_25058	SPU_025058	Sp-Odin/CajL	none	none	3|ankyrin-SAM adaptor proteins
M	Scaffold1858	64842	64842	1.18349e-12	1.71686e-10	-28.3879	GLEAN3_21019	SPU_021019	Sp-Fn3f_29	none	AAL35359.2	4
M	Scaffold222	56258	56258	1.48306e-12	2.12253e-10	31.7073	none	SPU_023192	Sp-Asah2L3	N-acylsphingosine amidohydrolase 2-like, neutral ceramidase-like	XP_011675864	2|Asah2 - N-acylsphingosine amidohydrolase 2 [Mus musculus]
M	Scaffold589	349447	349447	3.31827e-12	4.4223e-10	-27.0545	none	SPU_013535	none	none	none	none
M	Scaffold589	349447	349447	3.31827e-12	4.4223e-10	-27.0545	GLEAN3_13536	SPU_013536	Sp-Api	AlphaP, AlphaSU2, AlphaLV1	NP_999642.1	2|Alpha PS2, AlphaV-Alpha8-like
D	Scaffold1244	162355	162355	3.75621e-13	6.07511e-10	34.7147	GLEAN3_19696	SPU_019696	Sp-Nlr95	NACHT and LRR containing protein	none	5
M	Scaffold1404	68491	68491	4.98834e-12	6.40755e-10	-34.43	GLEAN3_21978	SPU_021978	Sp-Hypp_2591	hypothetical protein-2591; S-crystallin-like	AAA29403.1	2|AAA29403.1
M	Scaffold630	415259	415259	6.74102e-12	8.41166e-10	-31.6702	GLEAN3_12469	SPU_012469	Sp-Elk	Elk1/3/4-like, member of ETS oncogene family, Net-like, Sap-like	NA	1|Elk1 - ELK1, member of ETS oncogene family [Mus musculus], Elk3 - ELK3, member of ETS oncogene family [Mus musculus] and Elk4 [Mus musculus]
M	Scaffold3123	78347	78347	9.41554e-12	1.14229e-09	-26.8624	GLEAN3_13327	SPU_013327	Sp-Ebr1_7	egg bindin receptor 1-7	NP_999830.1	3|NP_999830.1
M	Scaffold427	127863	127863	1.30331e-11	1.52579e-09	29.1088	none	SPU_005394	none	none	none	none
M	Scaffold144	524461	524461	1.37658e-11	1.60721e-09	-28.8784	GLEAN3_00816	SPU_000816	Sp-Nlr81	NACHT and LRR containing protein	none	5
D	Scaffold1505	33001	33001	1.30467e-12	1.71643e-09	35.3324	GLEAN3_23111	SPU_023111	Sp-Hypp_2649	hypothetical protein-2649; endonuclease-reverse transcriptase-like	EDO42602.1	2|EDO42602.1
D	Scaffold1505	33001	33001	1.30467e-12	1.71643e-09	35.3324	GLEAN3_17118	SPU_017118	Sp-Endrvt33	endonuclease-reverse transcriptase-33	CAJ00235.1	3|CAJ00235.1
D	Scaffold144	524456	524456	1.45806e-12	1.90402e-09	30.6479	GLEAN3_00816	SPU_000816	Sp-Nlr81	NACHT and LRR containing protein	none	5
M	Scaffold37	127112	127112	1.7045e-11	1.95386e-09	35.4104	GLEAN3_17648	SPU_017648	Sp-Hypp137	hypothetical protein-137, DNA polymerase type B-like, Sp-Hypp_137, Sp-Hypp_950, Sp-Hypp_1329	XP_003731350	5
M	Scaffold37	127112	127112	1.7045e-11	1.95386e-09	35.4104	GLEAN3_01448	SPU_001448	Sp-Hypp_1329	hypothetical protein-1329	NA	1|XP_001600116.1
M	Scaffold37	127112	127112	1.7045e-11	1.95386e-09	35.4104	GLEAN3_19851	SPU_019851	Sp-Hypp_950	hypothetical protein-950; DNA polymerase-like	NA	3|XP_001599889.1
M	Scaffold40	549470	549470	2.291e-11	2.54903e-09	34.9359	GLEAN3_23511	SPU_023511	Sp-Gusb	Beta-glucuronidase precursor (Beta-G1)	114963	none
M	Scaffold100	128443	128443	2.38215e-11	2.6401e-09	26.7884	GLEAN3_25941	SPU_025941	Sp-Secisbp2L	SECIS binding protein 2-like	NP_076982.3	1|NP_076982.3
M	Scaffold162	348965	348965	3.26456e-11	3.51858e-09	-26.2494	GLEAN3_14576	SPU_014576	Sp-Pea	Polyomavirus enhancer activator 3-like, Etv1/4/5-like, ER81-like, E1AF-like, ERM-like	CAA60642	2|Etv1 - ets variant gene 1 [Mus musculus] , Etv4 - ets variant gene 4 [Mus musculus] and Etv5 - ets variant gene 5 [Mus musculus]
M	Scaffold2009	112270	112270	3.39741e-11	3.64903e-09	29.3652	none	SPU_013205	none	none	none	none
M	Scaffold341	657494	657494	4.49532e-11	4.698e-09	-32.243	GLEAN3_14807	SPU_014807	Sp-Ylpm1	YLP motif containing 1	BAA85182.1	1|BAA85182.1
M	Scaffold341	657494	657494	4.49532e-11	4.698e-09	-32.243	GLEAN3_24003	SPU_024003	Sp-Mmp1/3L2	matrix metalloproteinase 1	BAD97001	2|peptidase M10
M	Scaffold13	811166	811166	5.94711e-11	6.10668e-09	-31.5033	none	SPU_001410	none	none	NA	none
M	Scaffold144	524456	524456	5.9785e-11	6.13521e-09	-28.2663	GLEAN3_00816	SPU_000816	Sp-Nlr81	NACHT and LRR containing protein	none	5
D	Scaffold143	552016	552016	7.70111e-12	7.89326e-09	29.7579	none	SPU_007719	none	none	NA	none
M	Scaffold1858	64887	64887	1.16626e-10	1.12631e-08	-25.1155	GLEAN3_21019	SPU_021019	Sp-Fn3f_29	none	AAL35359.2	4
M	Scaffold295	303116	303116	1.32322e-10	1.265e-08	-26.8901	GLEAN3_01762	SPU_001762	Sp-Hypp_338	hypothetical protein-338; leucine-rich repeats and IQ motif containing 3-like	EEA35208.1	1|EEA35208.1
M	Scaffold1951	102666	102666	1.45342e-10	1.37481e-08	30.8925	none	SPU_005352	none	none	none	none
M	Scaffold419	220606	220606	1.63814e-10	1.52709e-08	-26.6384	GLEAN3_10257	SPU_010257	Sp-VldlrL	vitellogenin receptor-like	AAH70552.1	2|AAH70552.1
M	Scaffold144	524366	524366	1.67349e-10	1.55705e-08	-25.6664	GLEAN3_00816	SPU_000816	Sp-Nlr81	NACHT and LRR containing protein	none	5
D	Scaffold234	1093067	1093067	2.12547e-11	1.69548e-08	-25.2941	GLEAN3_08856	SPU_008856	Sp-Fbxo7	F-box protein 7	EDM17120.1	1|EDM17120.1
D	Scaffold144	524448	524448	2.29953e-11	1.77025e-08	27.8787	GLEAN3_00816	SPU_000816	Sp-Nlr81	NACHT and LRR containing protein	none	5
M	Scaffold3545	21023	21023	2.21758e-10	1.98527e-08	29.5444	GLEAN3_22831	SPU_022831	Sp-PppL_134	pol polyprotein like-134	XP_001922115.1	3|XP_001922115.1
D	Scaffold464	124294	124294	3.07018e-11	2.16499e-08	-32.3174	GLEAN3_26623	SPU_026623	Sp-Hypp_258	hypothetical protein-258	none	2|hypothetical protein-258
M	Scaffold1404	68466	68466	3.00548e-10	2.5872e-08	-31.4114	GLEAN3_21978	SPU_021978	Sp-Hypp_2591	hypothetical protein-2591; S-crystallin-like	AAA29403.1	2|AAA29403.1
D	Scaffold369	439400	439400	4.99911e-11	3.1475e-08	-28.5486	GLEAN3_11316	SPU_011316	Sp-Hypp_1972	hypothetical protein-1972	EDO49140.1	1|EDO49140.1
M	Scaffold408	638864	638864	4.28657e-10	3.56247e-08	-25.3338	GLEAN3_04722	SPU_004722	Sp-Wdr26	WDR26	XM_779272	5
M	Scaffold1404	68508	68508	4.55594e-10	3.7534e-08	-30.9818	GLEAN3_21978	SPU_021978	Sp-Hypp_2591	hypothetical protein-2591; S-crystallin-like	AAA29403.1	2|AAA29403.1
D	Scaffold144	524442	524442	6.55659e-11	3.89182e-08	27.2724	GLEAN3_00816	SPU_000816	Sp-Nlr81	NACHT and LRR containing protein	none	5
M	Scaffold69	913013	913013	6.9338e-10	5.47426e-08	-29.7949	GLEAN3_08467	SPU_008467	Sp-Cngb1	Cyclic-nucleotide-gated cation channel 4 (CNG channel 4) (CNG-4) (CNG4) (Cyclic nucleotide-gated cation channel modulatory subunit)	2493750	none
M	Scaffold1151	127794	127794	7.58532e-10	5.9228e-08	-28.562	GLEAN3_05534	SPU_005534	Sp-Slc17a5_2	Sialin (Solute carrier family 17 member 5) (Sodium/sialic acid cotransporter) (AST) (Membrane glycoprotein HP59)	48428688	none
M	Scaffold144	524448	524448	7.67412e-10	5.98806e-08	-25.6478	GLEAN3_00816	SPU_000816	Sp-Nlr81	NACHT and LRR containing protein	none	5
D	Scaffold278	543624	543624	1.16648e-10	6.12028e-08	30.4862	GLEAN3_26573	SPU_026573	Sp-Klkb1L	plasma kallikrein precursor, enteropeptidase, serine-like protease	AAH26555	5
M	Scaffold1151	127735	127735	1.11546e-09	8.29192e-08	-27.7778	GLEAN3_05534	SPU_005534	Sp-Slc17a5_2	Sialin (Solute carrier family 17 member 5) (Sodium/sialic acid cotransporter) (AST) (Membrane glycoprotein HP59)	48428688	none
M	Scaffold1151	127829	127829	1.15603e-09	8.55993e-08	-28.0203	GLEAN3_05534	SPU_005534	Sp-Slc17a5_2	Sialin (Solute carrier family 17 member 5) (Sodium/sialic acid cotransporter) (AST) (Membrane glycoprotein HP59)	48428688	none
M	Scaffold957	139145	139145	1.33997e-09	9.72344e-08	25.5984	GLEAN3_21838	SPU_021838	Sp-Non/MmyIIhcph	myosin II	72178080	1|myosin II
M	Scaffold2125	17692	17692	1.7354e-09	1.22285e-07	25.5241	GLEAN3_18218	SPU_018218	Sp-Myef2	myelin basic protein expression factor 2, repressor	BAC33325.1	1|myelin basic protein expression factor 2, repressor
M	Scaffold1404	68453	68453	2.16692e-09	1.48995e-07	-30.1709	GLEAN3_21978	SPU_021978	Sp-Hypp_2591	hypothetical protein-2591; S-crystallin-like	AAA29403.1	2|AAA29403.1
M	Scaffold1404	68493	68493	2.89668e-09	1.91228e-07	-29.6056	GLEAN3_21978	SPU_021978	Sp-Hypp_2591	hypothetical protein-2591; S-crystallin-like	AAA29403.1	2|AAA29403.1
D	Scaffold2268	55883	55883	5.18139e-10	2.00315e-07	26.2751	GLEAN3_01414	SPU_001414	Sp-PolppL_12	pol polyprotein-like-12	none	3|pol polyprotein-like-12
M	Scaffold324	168361	168361	3.28862e-09	2.13465e-07	25.2408	GLEAN3_25532	SPU_025532	Sp-Hypp_1151	hypothetical protein-1151; fem-1 homolog c (C. elegans)-like	XP_428816.2	1|XP_428816.2
M	Scaffold487	290270	290270	3.54496e-09	2.27762e-07	-27.0377	GLEAN3_17608	SPU_017608	Sp-Asns_3	asparagine synthetase	30583065	none
D	Scaffold132	826871	826871	8.97e-10	3.05868e-07	28.6637	GLEAN3_02686	SPU_002686	Sp-Gucy1b2	Guanylate cyclase soluble, beta-2 chain (GCS-beta-2)	14916977	none
M	Scaffold2531	61467	61467	5.66961e-09	3.42212e-07	-34.4212	GLEAN3_11531	SPU_011531	Sp-Daxx	Death domain-associated protein	BAB83852	5
M	Scaffold88	298515	298515	6.90371e-09	4.05059e-07	27.2819	none	SPU_017485	Sp-TxnL2	thioredoxin-like	BAK38716.1	5
M	Scaffold770	420723	420723	6.96925e-09	4.08506e-07	-25.9109	GLEAN3_03166	SPU_003166	Sp-Myc	myelocytomatosis viral related oncogene, Myc/Mycn/Mycl-like	NA	1|Mycn - v-myc myelocytomatosis viral related oncogene, neuroblastoma derived (avian) [Mus musculus], Myc - myelocytomatosis oncogene [Mus musculus] and Mycl - v-myc myelocytomatosis viral oncogene homolog, lung carcinoma derived (avian) [Mus musculus] \t
M	Scaffold3545	21065	21065	8.06823e-09	4.65875e-07	26.9524	GLEAN3_22831	SPU_022831	Sp-PppL_134	pol polyprotein like-134	XP_001922115.1	3|XP_001922115.1
M	Scaffold2268	55978	55978	8.25714e-09	4.74852e-07	-28.7623	GLEAN3_01414	SPU_001414	Sp-PolppL_12	pol polyprotein-like-12	none	3|pol polyprotein-like-12
M	Scaffold7	1147716	1147716	8.58298e-09	4.9127e-07	28.0142	GLEAN3_22819	SPU_022819	Sp-Hypp_190	hypothetical protein-190	XP_002121098.1	1|XP_002121098.1
M	Scaffold1117	261535	261535	9.3228e-09	5.29173e-07	-27.6666	GLEAN3_22056	SPU_022056	Sp-Ciz1	CDKN1A interacting zinc finger protein 1	AAH55672.1	3|CDKN1A interacting zinc finger protein 1
D	Scaffold519	35398	35398	1.83033e-09	5.31585e-07	27.8018	GLEAN3_21026	SPU_021026	Sp-Hypp_1009	hypothetical protein-1009; lambda-recombinase-like protein-like	XP_001341023.1	1|XP_001341023.1
D	Scaffold52	676646	676646	2.08532e-09	5.92749e-07	-25.1591	GLEAN3_27115	SPU_027115	Sp-AnL6	tolloid-like, BMP1-like, tollish	NP_001022731	2|M12A
D	Scaffold52	676646	676646	2.08532e-09	5.92749e-07	-25.1591	GLEAN3_09203	SPU_009203	Sp-AnL12	none	P98070	2|M12A
D	Scaffold1111	48686	48686	2.19179e-09	6.16257e-07	34.2385	GLEAN3_20909	SPU_020909	Sp-Plxnb1_2	plexin B1-2; semaphorin receptor SEP	BAA23703.2	3|BAA23703.2
D	Scaffold519	35483	35483	2.29835e-09	6.38079e-07	27.9016	GLEAN3_21026	SPU_021026	Sp-Hypp_1009	hypothetical protein-1009; lambda-recombinase-like protein-like	XP_001341023.1	1|XP_001341023.1
M	Scaffold202	551263	551263	1.20958e-08	6.63807e-07	27.8109	GLEAN3_24077	SPU_024077	Sp-TtlL	tubulin tyrosine ligase-like	NP_714923.1	1|NP_714923.1
M	Scaffold67	794748	794748	1.29995e-08	7.05897e-07	32.9227	GLEAN3_06054	SPU_006054	Sp-Frap_1	FKBP12-rapamycin complex-associated protein	P42345	1|FRAP/mTOR
M	Scaffold1170	149097	149097	1.56618e-08	8.30103e-07	-28.5615	GLEAN3_02778	SPU_002778	Sp-Unc44L_26	ankyrin2,3/unc44-like-26	none	3|ankyrin2,3/unc44-like-26
D	Scaffold3123	70905	70905	3.38465e-09	8.47564e-07	28.3992	GLEAN3_13327	SPU_013327	Sp-Ebr1_7	egg bindin receptor 1-7	NP_999830.1	3|NP_999830.1
M	Scaffold34	39514	39514	1.63423e-08	8.61352e-07	-31.9799	none	SPU_002855	none	none	none	none
D	Scaffold1216	29417	29417	3.84408e-09	9.41221e-07	26.0128	GLEAN3_08007	SPU_008007	Sp-PolppL_64	pol polyprotein-like-64	XP_001922214.1	3|pol polyprotein-like-64
M	Scaffold34	39526	39526	1.89615e-08	9.83275e-07	-31.7781	none	SPU_002855	none	none	none	none
M	Scaffold4	884810	884810	2.31168e-08	1.16855e-06	26.7259	GLEAN3_14405	SPU_014405	Sp-Pnr	photoreceptor-specific nuclear receptor-like, NR2E3, Hr51 homolog	NP_001090633	2|Nr2e3 - nuclear receptor subfamily 2, group E, member 3 [Mus musculus]
D	Scaffold123	1040918	1040918	5.26575e-09	1.1932e-06	-26.0294	GLEAN3_22753	SPU_022753	Sp-Sea/Ccp_1	none	none	5
D	Scaffold132	826882	826882	5.35897e-09	1.21121e-06	30.1163	GLEAN3_02686	SPU_002686	Sp-Gucy1b2	Guanylate cyclase soluble, beta-2 chain (GCS-beta-2)	14916977	none
D	Scaffold913	19563	19563	5.55065e-09	1.24179e-06	33.2976	none	SPU_000891	none	none	none	none
M	Scaffold7	1147684	1147684	2.50864e-08	1.25325e-06	30.3191	GLEAN3_22819	SPU_022819	Sp-Hypp_190	hypothetical protein-190	XP_002121098.1	1|XP_002121098.1
D	Scaffold234	474549	474549	5.83442e-09	1.29216e-06	-26.4376	GLEAN3_02533	SPU_002533	Sp-Melkl	maternal embryonic leucine zipper kinase	NP_055606	1|human MELK
D	Scaffold356	517543	517543	6.04779e-09	1.32774e-06	-25.3843	none	SPU_024710	none	none	none	none
M	Scaffold2452	31888	31888	2.70866e-08	1.34216e-06	26.9975	GLEAN3_23044	SPU_023044	Sp-Lrp6	none	XP-866872.1	1|LRP6
D	Scaffold244	183682	183682	7.40132e-09	1.55889e-06	29.3267	GLEAN3_12072	SPU_012072	Sp-Napepld	N-acyl-phosphatidylethanolamine phospholipase D	EAW83314.1	1|N-acyl-phosphatidylethanolamine phospholipase D
M	Scaffold3	1897882	1897882	4.18286e-08	1.95176e-06	-33.1295	GLEAN3_00178	SPU_000178	Sp-PP2aB56e	Epsilon isoform of regulatory subunit B56, protein phosphatase 2A	AAN14118	5
M	Scaffold687	70739	70739	4.83053e-08	2.19541e-06	-29.1358	none	SPU_012244	none	none	none	none
D	Scaffold1111	48676	48676	1.15804e-08	2.20467e-06	32.1571	GLEAN3_20909	SPU_020909	Sp-Plxnb1_2	plexin B1-2; semaphorin receptor SEP	BAA23703.2	3|BAA23703.2
D	Scaffold1216	29439	29439	1.1778e-08	2.23746e-06	25.5052	GLEAN3_08007	SPU_008007	Sp-PolppL_64	pol polyprotein-like-64	XP_001922214.1	3|pol polyprotein-like-64
D	Scaffold913	19549	19549	1.24555e-08	2.33099e-06	32.5569	none	SPU_000891	none	none	none	none
M	Scaffold1404	68521	68521	5.5708e-08	2.48772e-06	-27.051	GLEAN3_21978	SPU_021978	Sp-Hypp_2591	hypothetical protein-2591; S-crystallin-like	AAA29403.1	2|AAA29403.1
M	Scaffold3665	9309	9309	6.62088e-08	2.87457e-06	32.8978	GLEAN3_03095	SPU_003095	Sp-PolppL_24	pol polyprotein0like-24	XP_001921496.1	3|pol polyprotein0like-24
M	Scaffold357	194336	194336	7.56306e-08	3.20765e-06	27.2344	GLEAN3_18086	SPU_018086	Sp-Mri1	methylthioribose-1-phosphate isomerase homolog (S. cerevisiae); translation initiation factor eIF-2B subunit alpha/beta/delta-like protein	AAH01703.1	1|AAH01703.1
M	Scaffold357	194336	194336	7.56306e-08	3.20765e-06	27.2344	GLEAN3_03806	SPU_003806	Sp-Ei2bL	transcription initiation factor eIF-2B subunit alpha/beta/delta-like protein	EDL10941.1	1|transcription initiation factor eIF-2B subunit alpha/beta/delta-like protein
D	Scaffold2104	71630	71630	1.8832e-08	3.21076e-06	26.9653	GLEAN3_18132	SPU_018132	Sp-Fdxr	NADPH:adrenodoxin oxidoreductase, mitochondrial precursor (Adrenodoxin reductase) (AR) (Ferredoxin--NADP(+) reductase)	3041656	none
D	Scaffold1337	51930	51930	1.95383e-08	3.29927e-06	-25.0252	GLEAN3_12117	SPU_012117	Sp-Hypp_2017	hypothetical protein-2017	EDO35469.1	3|EDO35469.1
D	Scaffold1	1945499	1945499	2.07041e-08	3.44662e-06	31.0294	GLEAN3_06127	SPU_006127	Sp-Svep1L_10	sushi, von Willebrand factor type A, EGF and pentraxin domain containing 1-like-10; polydom-like	NP_699197.3	3|NP_699197.3
D	Scaffold944	131078	131078	2.40485e-08	3.8367e-06	-31.5074	GLEAN3_09975	SPU_009975	Sp-Abcb1b_1	ATP-binding cassette, sub-family B (MDR/TAP), member 1B-1	AAA79005.1	1|AAA79005.1
D	Scaffold2160	46322	46322	2.49044e-08	3.93703e-06	28.1778	GLEAN3_25913	SPU_025913	Sp-PppL_146	pol polyprotein like-146	XP_001922381.1	3|XP_001922381.1
M	Scaffold35	564564	564564	1.04917e-07	4.23177e-06	31.0262	none	SPU_007060	none	none	none	none
M	Scaffold2834	24485	24485	1.15578e-07	4.59497e-06	26.2723	GLEAN3_17933	SPU_017933	Sp-Srcr140	none	none	3|SRCR
M	Scaffold18	915582	915582	1.15711e-07	4.5986e-06	25.7849	GLEAN3_22814	SPU_022814	Sp-Srcr197	scavenger receptor cysteine-rich domain containing 197, sperm-activating peptide I-crosslinked protein, Sp-Srcr73	BAA04659.1	5
M	Scaffold1907	70442	70442	1.18332e-07	4.68313e-06	29.1281	none	SPU_020701	none	none	none	none
D	Scaffold343	419655	419655	3.20064e-08	4.75755e-06	25.0234	GLEAN3_08490	SPU_008490	Sp-Kiaa1751L_2	KIAA1751 protein-like, Sp-C1orf222L	XP_006819212	1|2010015L04Rik - RIKEN cDNA 2010015L04 gene [Mus musculus]
M	Scaffold406	392686	392686	1.38537e-07	5.35546e-06	-32.1783	GLEAN3_25010	SPU_025010	Sp-FoxK	forkhead box K, Foxk1/2-like	XP_002742034	1|fd68A - forkhead domain 68A [Drosophila melanogaster]
M	Scaffold384	5894	5894	1.38842e-07	5.36161e-06	-26.481	GLEAN3_10904	SPU_010904	Sp-PolppL_90	pol polyprotein-like-90; gag-pol polyprotein-like	CAJ00250.1	3|pol polyprotein-like-90; gag-pol polyprotein-like
D	Scaffold913	19487	19487	3.72787e-08	5.3736e-06	31.3643	none	SPU_000891	none	none	none	none
M	Scaffold67	794786	794786	1.40694e-07	5.42329e-06	30.3914	GLEAN3_06054	SPU_006054	Sp-Frap_1	FKBP12-rapamycin complex-associated protein	P42345	1|FRAP/mTOR
D	Scaffold668	88421	88421	4.15187e-08	5.81827e-06	-37.991	GLEAN3_02787	SPU_002787	Sp-Glur3	AMPA glutamate receptor 3	AAQ08959.1	1|AMPA glutamate receptor 3
M	Scaffold501	319360	319360	1.53409e-07	5.83687e-06	-30.6288	GLEAN3_07965	SPU_007965	Sp-Cep120	centrosomal protein 120	EDL09904.1	1|EDL09904.1
M	Scaffold501	319360	319360	1.53409e-07	5.83687e-06	-30.6288	GLEAN3_07973	SPU_007973	Sp-Ck1g	casein kinase I gamma subunit 3 isoform 1	XP_779900.1	5
M	Scaffold94	548012	548012	1.6276e-07	6.13648e-06	28.9574	none	SPU_020682	none	none	none	none
D	Scaffold2160	46326	46326	4.51435e-08	6.21751e-06	27.7847	GLEAN3_25913	SPU_025913	Sp-PppL_146	pol polyprotein like-146	XP_001922381.1	3|XP_001922381.1
D	Scaffold3123	70877	70877	4.5964e-08	6.29635e-06	26.6879	GLEAN3_13327	SPU_013327	Sp-Ebr1_7	egg bindin receptor 1-7	NP_999830.1	3|NP_999830.1
M	Scaffold13	11797	11797	1.70399e-07	6.37793e-06	-31.3283	GLEAN3_10311	SPU_010311	Sp-Nifun	NifU-like N-terminusinal domain containing protein, mitochondrial precursor (NifU-like protein)	62900734	none
D	Scaffold2160	46365	46365	4.74956e-08	6.42599e-06	28.1008	GLEAN3_25913	SPU_025913	Sp-PppL_146	pol polyprotein like-146	XP_001922381.1	3|XP_001922381.1
M	Scaffold357	194268	194268	2.58517e-07	9.04643e-06	26.6222	GLEAN3_18086	SPU_018086	Sp-Mri1	methylthioribose-1-phosphate isomerase homolog (S. cerevisiae); translation initiation factor eIF-2B subunit alpha/beta/delta-like protein	AAH01703.1	1|AAH01703.1
M	Scaffold357	194268	194268	2.58517e-07	9.04643e-06	26.6222	GLEAN3_03806	SPU_003806	Sp-Ei2bL	transcription initiation factor eIF-2B subunit alpha/beta/delta-like protein	EDL10941.1	1|transcription initiation factor eIF-2B subunit alpha/beta/delta-like protein
D	Scaffold1505	32987	32987	8.29863e-08	9.79892e-06	27.4933	GLEAN3_23111	SPU_023111	Sp-Hypp_2649	hypothetical protein-2649; endonuclease-reverse transcriptase-like	EDO42602.1	2|EDO42602.1
D	Scaffold1505	32987	32987	8.29863e-08	9.79892e-06	27.4933	GLEAN3_17118	SPU_017118	Sp-Endrvt33	endonuclease-reverse transcriptase-33	CAJ00235.1	3|CAJ00235.1
D	Scaffold86	1056549	1056549	9.37219e-08	1.07638e-05	26.0398	GLEAN3_12936	SPU_012936	Sp-ThrombB1	none	none	2|TSP3_HUMAN
M	Scaffold384	5853	5853	3.26847e-07	1.09973e-05	-25.8187	GLEAN3_10904	SPU_010904	Sp-PolppL_90	pol polyprotein-like-90; gag-pol polyprotein-like	CAJ00250.1	3|pol polyprotein-like-90; gag-pol polyprotein-like
M	Scaffold384	5869	5869	3.26847e-07	1.09973e-05	-25.8187	GLEAN3_10904	SPU_010904	Sp-PolppL_90	pol polyprotein-like-90; gag-pol polyprotein-like	CAJ00250.1	3|pol polyprotein-like-90; gag-pol polyprotein-like
M	Scaffold2764	28355	28355	3.57032e-07	1.18515e-05	-25.246	GLEAN3_07818	SPU_007818	Sp-PolppL_62	pol polyprotein-like-62	XP_001921759.1	3|pol polyprotein-like-62
D	Scaffold165	581142	581142	1.29997e-07	1.36902e-05	-35.2601	GLEAN3_27074	SPU_027074	Sp-Hypp_1196	hypothetical protein-1196	XP_002111687.1	1|XP_002111687.1
D	Scaffold1111	48717	48717	1.58661e-07	1.58563e-05	29.9543	GLEAN3_20909	SPU_020909	Sp-Plxnb1_2	plexin B1-2; semaphorin receptor SEP	BAA23703.2	3|BAA23703.2
M	Scaffold34	39528	39528	5.15249e-07	1.60648e-05	-28.6487	none	SPU_002855	none	none	none	none
M	Scaffold3172	40331	40331	5.3228e-07	1.64813e-05	-26.9119	GLEAN3_04254	SPU_004254	Sp-PolypL_961	polyprotein-like-61	ABM90393.1	3|ABM90393.1
D	Scaffold1	1945411	1945411	1.68811e-07	1.65058e-05	26.4511	GLEAN3_06127	SPU_006127	Sp-Svep1L_10	sushi, von Willebrand factor type A, EGF and pentraxin domain containing 1-like-10; polydom-like	NP_699197.3	3|NP_699197.3
M	Scaffold357	194289	194289	5.48945e-07	1.6892e-05	25.561	GLEAN3_18086	SPU_018086	Sp-Mri1	methylthioribose-1-phosphate isomerase homolog (S. cerevisiae); translation initiation factor eIF-2B subunit alpha/beta/delta-like protein	AAH01703.1	1|AAH01703.1
M	Scaffold357	194289	194289	5.48945e-07	1.6892e-05	25.561	GLEAN3_03806	SPU_003806	Sp-Ei2bL	transcription initiation factor eIF-2B subunit alpha/beta/delta-like protein	EDL10941.1	1|transcription initiation factor eIF-2B subunit alpha/beta/delta-like protein
M	Scaffold357	194320	194320	5.58584e-07	1.71369e-05	25.4607	GLEAN3_03806	SPU_003806	Sp-Ei2bL	transcription initiation factor eIF-2B subunit alpha/beta/delta-like protein	EDL10941.1	1|transcription initiation factor eIF-2B subunit alpha/beta/delta-like protein
M	Scaffold357	194320	194320	5.58584e-07	1.71369e-05	25.4607	GLEAN3_18086	SPU_018086	Sp-Mri1	methylthioribose-1-phosphate isomerase homolog (S. cerevisiae); translation initiation factor eIF-2B subunit alpha/beta/delta-like protein	AAH01703.1	1|AAH01703.1
D	Scaffold2160	46306	46306	1.87239e-07	1.7699e-05	26.5464	GLEAN3_25913	SPU_025913	Sp-PppL_146	pol polyprotein like-146	XP_001922381.1	3|XP_001922381.1
M	Scaffold67	794742	794742	5.8172e-07	1.77255e-05	28.7455	GLEAN3_06054	SPU_006054	Sp-Frap_1	FKBP12-rapamycin complex-associated protein	P42345	1|FRAP/mTOR
M	Scaffold3665	9258	9258	5.98661e-07	1.81739e-05	28.5639	GLEAN3_03095	SPU_003095	Sp-PolppL_24	pol polyprotein0like-24	XP_001921496.1	3|pol polyprotein0like-24
D	Scaffold2160	46309	46309	1.94623e-07	1.81818e-05	26.1354	GLEAN3_25913	SPU_025913	Sp-PppL_146	pol polyprotein like-146	XP_001922381.1	3|XP_001922381.1
M	Scaffold3665	9254	9254	6.60935e-07	1.97427e-05	31.1185	GLEAN3_03095	SPU_003095	Sp-PolppL_24	pol polyprotein0like-24	XP_001921496.1	3|pol polyprotein0like-24
M	Scaffold1046	83043	83043	7.33934e-07	2.15544e-05	30.0388	GLEAN3_16983	SPU_016983	Sp-Kif1a	kinesin family member 1A; axonal transport of synaptic vesicles; kinesin-like protein KIF1A	EAW71214.1	1|kinesin family member 1A; axonal transport of synaptic vesicles; kinesin-like protein KIF1A
M	Scaffold1046	83043	83043	7.33934e-07	2.15544e-05	30.0388	GLEAN3_16434	SPU_016434	Sp-Kif1a_1	kinesin family member 1A-1	EAW71214.1	1|EAW71214.1
M	Scaffold36	569153	569153	8.38613e-07	2.40284e-05	30.6466	GLEAN3_09109	SPU_009109	Sp-Znrd1	zinc ribbon domain containing 1, DNA-directed RNA polymerase I subunit RPA12	XP_004671977	1|Znrd1 - zinc ribbon domain containing, 1 [Mus musculus]
D	Scaffold1505	32938	32938	3.10759e-07	2.57082e-05	27.1339	GLEAN3_23111	SPU_023111	Sp-Hypp_2649	hypothetical protein-2649; endonuclease-reverse transcriptase-like	EDO42602.1	2|EDO42602.1
D	Scaffold1505	32938	32938	3.10759e-07	2.57082e-05	27.1339	GLEAN3_17118	SPU_017118	Sp-Endrvt33	endonuclease-reverse transcriptase-33	CAJ00235.1	3|CAJ00235.1
M	Scaffold111	170611	170611	9.68416e-07	2.71453e-05	-30.3738	GLEAN3_22570	SPU_022570	Sp-Casc1	Cancer Susceptibility Gene 1	none	5
D	Scaffold116	679691	679691	3.60636e-07	2.84422e-05	26.665	GLEAN3_09718	SPU_009718	Sp-Dsp6	MKP-3	AAR16274	5
D	Scaffold116	679691	679691	3.60636e-07	2.84422e-05	26.665	GLEAN3_28124	SPU_028124	Sp-Dusp6/7/9	dual specificity phosphatase 6/7/9-like, Mkp3 homolog, Sp-Dusp6, Sp-Dsp6	XP_002738179	1|Dusp6 - dual specificity phosphatase 6 [Mus musculus], Dusp7 - dual specificity phosphatase 7 [Mus musculus] and Dusp9 - dual specificity phosphatase 9 [Mus musculus]
M	Scaffold1132	50928	50928	1.07891e-06	2.96619e-05	25.072	GLEAN3_22682	SPU_022682	Sp-Rps11	ribosomal protein S11	NP_001006	1|human RPS11
M	Scaffold736	73901	73901	1.2754e-06	3.40161e-05	-27.6377	GLEAN3_00135	SPU_000135	Sp-Zf(mynd)_13L	zinc finger (MYND)-13 like	FAA00235.1	1|zinc finger (MYND)-13 like
M	Scaffold11	815640	815640	1.29668e-06	3.4449e-05	27.9229	GLEAN3_13529	SPU_013529	Sp-Slc4a2_1	Anion exchange protein 2 (Non-erythroid band 3-like protein) (AE2 anion exchanger) (Solute carrier family 4 member 2)	20178275	none
M	Scaffold11	815640	815640	1.29668e-06	3.4449e-05	27.9229	none	SPU_027760	none	none	none	none
M	Scaffold3172	40370	40370	1.47312e-06	3.8324e-05	-26.006	GLEAN3_04254	SPU_004254	Sp-PolypL_961	polyprotein-like-61	ABM90393.1	3|ABM90393.1
M	Scaffold736	73856	73856	1.52653e-06	3.94845e-05	-26.1872	GLEAN3_00135	SPU_000135	Sp-Zf(mynd)_13L	zinc finger (MYND)-13 like	FAA00235.1	1|zinc finger (MYND)-13 like
M	Scaffold34	39562	39562	1.60712e-06	4.12001e-05	-27.5522	none	SPU_002855	none	none	none	none
D	Scaffold993	102851	102851	7.93779e-07	5.07937e-05	27.2258	GLEAN3_21701	SPU_021701	Sp-Uba1	ubiquitin-activating enzyme E1; ubiquitin-like modifier-activating enzyme 1	NP_033483.1	1|ubiquitin-activating enzyme E1; ubiquitin-like modifier-activating enzyme 1
M	Scaffold3172	40357	40357	2.35175e-06	5.63963e-05	-25.4329	GLEAN3_04254	SPU_004254	Sp-PolypL_961	polyprotein-like-61	ABM90393.1	3|ABM90393.1
M	Scaffold736	73890	73890	2.42593e-06	5.78255e-05	-26.7461	GLEAN3_00135	SPU_000135	Sp-Zf(mynd)_13L	zinc finger (MYND)-13 like	FAA00235.1	1|zinc finger (MYND)-13 like
D	Scaffold491	273427	273427	1.40067e-06	7.67327e-05	25.5565	none	SPU_002058	none	none	none	none
D	Scaffold1337	51412	51412	2.13432e-06	0.000103711	25.1592	GLEAN3_12117	SPU_012117	Sp-Hypp_2017	hypothetical protein-2017	EDO35469.1	3|EDO35469.1
D	Scaffold1505	32914	32914	2.44904e-06	0.000115071	25.1949	GLEAN3_23111	SPU_023111	Sp-Hypp_2649	hypothetical protein-2649; endonuclease-reverse transcriptase-like	EDO42602.1	2|EDO42602.1
D	Scaffold1505	32914	32914	2.44904e-06	0.000115071	25.1949	GLEAN3_17118	SPU_017118	Sp-Endrvt33	endonuclease-reverse transcriptase-33	CAJ00235.1	3|CAJ00235.1
M	Scaffold65	694658	694658	6.69064e-06	0.000131752	-25.015	GLEAN3_07148	SPU_007148	Sp-TesL	Testin-like, testis derived transcript-like, Sp-Triple_lim, Sp-Pric2	XP_003500819	2|Tes - testis derived transcript [Mus musculus]
M	Scaffold372	263010	263010	6.79039e-06	0.000133408	29.0569	GLEAN3_06294	SPU_006294	Sp-Polg	polymerase (DNA directed), gamma; Sp-Polg_1	\tXP_011677207	1|Polg - polymerase (DNA directed), gamma [Mus musculus]
M	Scaffold372	263010	263010	6.79039e-06	0.000133408	29.0569	GLEAN3_12665	SPU_012665	Sp-Polg_1	polymerase (DNA directed) gamma (partial duplicate)	\tXP_011677207	1|Polg - polymerase (DNA directed), gamma [Mus musculus]
D	Scaffold944	131135	131135	4.15149e-06	0.000168467	-26.0662	GLEAN3_09975	SPU_009975	Sp-Abcb1b_1	ATP-binding cassette, sub-family B (MDR/TAP), member 1B-1	AAA79005.1	1|AAA79005.1
D	Scaffold887	10827	10827	4.28286e-06	0.000172382	-25.0148	GLEAN3_15918	SPU_015918	Sp-Fn3_31	none	NP_491240.2	4
D	Scaffold316	224437	224437	4.95772e-06	0.00019129	27.9095	GLEAN3_06335	SPU_006335	Sp-Hypp_476	hypothetical protein-476	XP_002219152.1	1|XP_002219152.1
D	Scaffold457	158146	158146	5.92983e-06	0.000219894	26.2585	GLEAN3_09027	SPU_009027	Sp-Rab35	RAS-Related Protein RAB-35	XP_509422.1	5
D	Scaffold341	618412	618412	6.82549e-06	0.000243825	25.2114	GLEAN3_14807	SPU_014807	Sp-Ylpm1	YLP motif containing 1	BAA85182.1	1|BAA85182.1
D	Scaffold944	131164	131164	7.26501e-06	0.000255896	-25.5825	GLEAN3_09975	SPU_009975	Sp-Abcb1b_1	ATP-binding cassette, sub-family B (MDR/TAP), member 1B-1	AAA79005.1	1|AAA79005.1
D	Scaffold913	19472	19472	8.30391e-06	0.000281575	25.6201	none	SPU_000891	none	none	none	none
D	Scaffold2047	75687	75687	1.0356e-05	0.00032996	26.0582	GLEAN3_00583	SPU_000583	Sp-Muc4l	mucin 4-like	AF441786_1	3|mucin 4-like
M	Scaffold120	567020	567020	2.38848e-05	0.000362204	27.7469	GLEAN3_20578	SPU_020578	Sp-Gdpd5L	glycerophosphodiester phosphodiesterase domain containing 5-like, Sp-Gdpd5	\tXP_797443	2|Gdpd5 - glycerophosphodiester phosphodiesterase domain containing 5 [Mus musculus] and Gdpd2 - glycerophosphodiester phosphodiesterase domain containing 2 [Mus musculus]
D	Scaffold913	19513	19513	1.20869e-05	0.000368845	25.0065	none	SPU_000891	none	none	none	none
D	Scaffold99	64286	64286	1.2178e-05	0.000371174	25.3094	GLEAN3_14791	SPU_014791	Sp-Gmps	GMP synthase [glutamine-hydrolyzing] (Glutamine amidotransferase) (GMP synthetase)	1708072	none
M	Scaffold340	672568	672568	3.08687e-05	0.00044395	-25.1061	GLEAN3_13412	SPU_013412	Sp-NipbL	Nipped-B homolog (Drosophila)-like; delangin	NP_957684.1	1|NP_957684.1
D	Scaffold13	11820	11820	1.68463e-05	0.000466446	26.0482	GLEAN3_10311	SPU_010311	Sp-Nifun	NifU-like N-terminusinal domain containing protein, mitochondrial precursor (NifU-like protein)	62900734	none
D	Scaffold325	282170	282170	2.04136e-05	0.000536724	-25.6595	GLEAN3_08845	SPU_008845	Sp-Mlxip	MLX interacting protein(-like), Mlx interactor (Mio) homolog, Mondo, CHREBP-like, Sp-Mlx/Ip, Sp-MlxIPL	XP_003761109	1|Mlxip - MLX interacting protein [Mus musculus] and Mlxipl - MLX interacting protein-like [Mus musculus]
M	Scaffold797	41537	41537	4.23121e-05	0.000567314	26.1192	GLEAN3_17974	SPU_017974	Sp-Cttnbp2	cortactin binding protein 2	NP_001107873.1	1|NP_001107873.1
D	Scaffold110	642984	642984	2.30822e-05	0.000583062	25.2816	GLEAN3_07127	SPU_007127	Sp-Abhd3	abhydrolase domain containing 3; lung alpha/beta hydrolase fold protein 3	NP_598891.1	1|abhydrolase domain containing 3; lung alpha/beta hydrolase fold protein 3
D	Scaffold1422	168439	168439	2.34109e-05	0.000588332	-25.288	GLEAN3_22048	SPU_022048	Sp-Clint1L	clathrin interactor 1-like; enthoprotin-like	BAC03971.1	1|BAC03971.1
M	Scaffold2192	38620	38620	6.03443e-05	0.000749285	-25.2341	GLEAN3_13461	SPU_013461	Sp-Hypp_717	hypothetical protein-717; serine/threonine protein phosphatase-like	EEA57960.1	1|EEA57960.1
M	Scaffold213	187394	187394	7.32576e-05	0.000870238	26.0757	GLEAN3_01557	SPU_001557	Sp-Hypp_1336	hypothetical protein-1336	none	5
D	Scaffold2192	38620	38620	6.96048e-05	0.00126424	-25.126	GLEAN3_13461	SPU_013461	Sp-Hypp_717	hypothetical protein-717; serine/threonine protein phosphatase-like	EEA57960.1	1|EEA57960.1
M	Scaffold2	1618556	1618556	0.00016949	0.00164738	-25.2926	GLEAN3_04811	SPU_004811	Sp-PolppL_39	pol polyprotein-like-39	XP_001921496.1	3|pol polyprotein-like-39
D	Scaffold668	88364	88364	0.000188251	0.00252316	-25.1224	GLEAN3_02787	SPU_002787	Sp-Glur3	AMPA glutamate receptor 3	AAQ08959.1	1|AMPA glutamate receptor 3
